1 **Effect of Cryopreservation and Post-Cryopreservation Somatic Embryogenesis on**  
2 **the Epigenetic Fidelity of Cocoa (*Theobroma cacao* L.)**

3 Raphael Adu-Gyamfi<sup>1</sup>, Andy Wetten<sup>2</sup>, Carlos Marcelino Rodríguez López<sup>3\*</sup>

4 1 Faculty of Agriculture, University for Development Studies, P.O. Box TL 1882, Tamale, Ghana,

5 2 School of Agriculture, Policy and Development, University of Reading, Whiteknights, Reading,  
6 Berks, RG6 6AS, United Kingdom,

7 3 Environmental Epigenetics and Genetics Group, Plant Research Centre, School of Agriculture, Food  
8 and Wine, Faculty of Sciences, University of Adelaide, Waite Campus, PMB1, Glen Osmond, SA,  
9 5064, Australia

10 \* carlos.rodriguezlopez@adelaide.edu.au

11

12 While cocoa plants regenerated from cryopreserved somatic embryos can demonstrate high levels of  
13 phenotypic variability, little is known about the sources of the observed variability. Previous studies  
14 have shown that the encapsulation-dehydration cryopreservation methodology imposes no significant  
15 extra mutational load since embryos carrying high levels of genetic variability are selected against  
16 during protracted culture. Also, the use of secondary rather than primary somatic embryos has been  
17 shown to further reduce the incidence of genetic somaclonal variation. Here, the effect of *in vitro*  
18 conservation, cryopreservation and post-cryopreservation generation of somatic embryos on the  
19 appearance of epigenetic somaclonal variation were comparatively assessed. To achieve this we  
20 compared the epigenetic profiles, generated using Methylation Sensitive Amplified Polymorphisms,  
21 of leaves collected from the ortet tree and from cocoa somatic embryos derived from three *in vitro*  
22 conditions: somatic embryos, somatic embryos cryopreserved in liquid nitrogen and somatic embryos  
23 generated from cryopreserved somatic embryos. Somatic embryos accumulated epigenetic changes  
24 but these were less extensive than in those regenerated after storage in LN. Furthermore, the passage  
25 of cryopreserved embryos through another embryogenic stage led to further increase in variation.  
26 Interestingly, this detected variability appears to be in some measure reversible. The outcome of this  
27 study indicates that the cryopreservation induced phenotypic variability could be, at least partially, due  
28 to DNA methylation changes. Key message: Phenotypic variability observed in cryostored cocoa  
29 somatic-embryos is epigenetic in nature. This variability is partially reversible, not stochastic in nature  
30 but a directed response to the *in-vitro* culture and cryopreservation.

31

## 32 **Introduction**

33

34 The propagation of plant material through *in vitro* culture can lead to marked increases in the frequency  
35 of variants [1]. These enhanced frequencies can be higher than those associated with the use of  
36 mutagens [2] and have been termed somaclonal variation [3]. The nature of such variation can be

37 genetic (altering the DNA sequence of the ramets) and/or epigenetic (which does not affect the DNA  
38 sequence but affects its chemistry and structure, gene expression and may ultimately induce some form  
39 of phenotypic abnormality [4]. The addition of a methyl group to cytosine residues (cytosine  
40 methylation) is probably the most studied feature of epigenetic regulation in Eukaryotes. In plants, it  
41 occurs in three sequence contexts: CG, CNG, or CNN (in order of relative abundance) (N = any  
42 nucleotide other than G [5]). Cytosine methylation occurring within promoters or coding regions  
43 typically acts to repress gene transcription by changing local chromatin structure [6], thereby  
44 preventing the binding of DNA-binding proteins to the promoter regions [7] or as a binding cue for  
45 transcriptional repressions [8].

46 Different factors have been reported to affect the level of both genetic and epigenetic somaclonal  
47 variation induced during *in vitro* culture, including: **1.** Medium composition [9,10]. **2.** The propagation  
48 technique used, with methods involving a dedifferentiated callus phase expected to show higher levels  
49 of variability [11]. **3.** Origin of the donor tissue, with regenerants maintaining epigenetic features of  
50 the explant tissue used for propagation [12]. **4.** Time in culture and number of regeneration events [12].  
51 Somaclonal variation generally increases with prolonged callus phase and with the number of  
52 multiplication cycles [3,13]. However, Rodríguez López et al. [12] observed that older cocoa calli, as  
53 well as exhibiting reduced embryogenic potential, yielded somatic embryos (SE) containing less  
54 genetic and epigenetic aberrations. They hypothesised that totipotent cell lineages with few or no  
55 mutations are selected during protracted cultures. In cocoa, primary somatic embryogenesis has  
56 previously been shown to induce high levels of chimeric [14] and homogenous [12,15] genetic and  
57 epigenetic mutants. Nevertheless, in the same studies fewer genetic variants were detected among  
58 secondary somatic embryos (SSEs) than among primary somatic embryos (PSEs). These findings are  
59 in line with Fang et al. [16] who reported an absence of mutations in the SSE population of cocoa  
60 studied probably due to SSEs being derived directly from epidermal cells rather than from  
61 dedifferentiated callus.

62 Due to the difficulty in generating large quantities of cocoa plants via cuttings and to the recalcitrant  
63 nature of cocoa seed with regard to low temperature storage, cryopreservation of tissue-cultured  
64 germplasm represents the most attractive backup for vulnerable field collections of the species. The  
65 lengthy culture periods associated with the establishment of embryogenic cocoa callus lines also mean  
66 that it will be a wise precaution to back up large *in vitro* germplasm collections with cryopreserved  
67 cell lines. Different groups have shown that the encapsulation-dehydration [16] and cryopreservation  
68 of plant material [17] do not impose a significant extra genetic mutational load to the plants regenerated  
69 *in vitro*. However, little is known about how the cryopreservation methodology and subsequent  
70 propagation cycles affect the fidelity of the regenerant plants from an epigenetic perspective.

71 Methylation-sensitive amplified polymorphism (MSAP) is a modification of Amplified Fragment  
72 Length Polymorphism that makes use of differential sensitivity of certain restriction endonucleases to  
73 cytosine methylation to study the level and global patterns of methylation across the target genomes  
74 [18]. MSAP employs a pair of isoschizomer enzymes (*HpaII* and *MspI*) with differential sensitivity to  
75 methylation in their recognition sequence. In short, *HpaII* is inactive (does not cut its recognition site,  
76 5'-CCGG-3') if one or both cytosines are methylated on both DNA strands, but cleaves when all  
77 cytosines are unmethylated or if one or both cytosines are methylated in only one strand. *MspI* is, in  
78 contrast, considered by convention methylation to be insensitive and cleaves if all cytosines are  
79 unmethylated, and if the internal cytosine is methylated but not when the external cytosine is  
80 methylated. MSAP analysis has been previously used for the detection of tissue culture induced  
81 epigenetic changes in a large number of plant taxa [19], including important crops such as: tobacco  
82 [9], rice [20], oil palm [21], barley [22], pea [23], potato [24], cocoa [12], grapevine [25], cassava [26],  
83 and garlic [27]. In this study we used the MSAP technology to determine the effect of cryopreservation  
84 and post-cryopreservation regeneration of tertiary SEs (TSEs) on the appearance of somaclonal  
85 variation compared to equivalent variation in long term *in vitro* conservation of cocoa SSEs.

## 86 Materials and Methods

87

### 88 Plant Material

89 All the SEs used in this study were generated from a single AMAZ 15 cocoa tree held in the  
 90 International Cocoa Quarantine Centre, Reading, UK, with somatic embryogenesis initiated from  
 91 staminode cultures as described in [28]. Three groups of propagules plus a set of reference samples  
 92 from the ortet tree were compared: **1** SSEs maintained in ED medium [28] culture for the 357 d  
 93 duration of the experiment (*‘in vitro’* hereafter); **2** SSEs recovered after 1 h storage in liquid nitrogen  
 94 (LN) using vitrification-based cryopreservation [29] (*‘1 h LN’* hereafter); **3** TSEs regenerated from 1  
 95 h LN cotyledon explants following [28] (*‘post 1 h LN’* hereafter) and **4** the ortet tree reference set were  
 96 6 mm discs obtained from 24 randomly selected recently expanded leaves from the donor tree. All  
 97 samples were kept at -20°C until DNA extraction (see Fig 1 and Table 1).

98

99 **Table 1. Description of cocoa samples used for MSAP analysis.**

| Conservation method | Treatment description                        | Duration of treatment (days) |                             |                            |                                                                                            |
|---------------------|----------------------------------------------|------------------------------|-----------------------------|----------------------------|--------------------------------------------------------------------------------------------|
|                     |                                              | Cryo                         | P-cryo <i>in vitro</i> time | P-TSE <i>in vitro</i> time | Tissue sampled for MSAP                                                                    |
| In vitro            | 24 SSEs maintained in ED medium              | NA                           | NA                          | NA                         | 357 d after culture initiation                                                             |
| 1 h LN              | 24 SSEs recovered after 1 hour storage in LN | 175                          | 182                         | NA                         | 182 d after cryopreservation and 357 d after culture initiation                            |
| Post 1 h LN         | 24 TSEs obtained from 1 h LN SSE             | 175                          | 87                          | 95                         | 95 d after TSE initiation, 182 d after cryopreservation and 357 d after culture initiation |

|       |                       |    |    |    |    |
|-------|-----------------------|----|----|----|----|
| Donor | 24 Ortet plant leaves | NA | NA | NA | NA |
|-------|-----------------------|----|----|----|----|

100 **NA:** not applicable. **Cryo:** Number of days since the initiation of somatic embryos from staminodes,  
101 prior to samples being subjected to cryopreservation. **P-cryo *in vitro* time:** Number of days that  
102 secondary somatic embryos (SSEs) spent in ED medium [28] since they were removed from  
103 cryopreservation. **P-TSE *in vitro* time:** Number of days that tertiary somatic embryos (TSEs) spent  
104 in ED medium [28] since the tertiary somatic embryogenesis event.

105

### 106 **DNA extraction**

107 Genomic DNA was extracted from leaves of somatic embryos and donor plant using the DNeasy 96  
108 plant kit (Qiagen, UK) following manufacturer's instructions and eluted in 50 µl Buffer AE (Qiagen).  
109 Two replicate extractions were performed for each sample. The DNA was quantified on a NanoDrop™  
110 2000c (ThermoLifescience). Extracted DNAs were diluted with nanopure water to produce working  
111 stocks of 10 ng/µl.

### 112 **MSAP procedure**

113 A modification of the original MSAP method, as described by Rodríguez López et al. [30], was used  
114 on all DNA extractions. In short, the method consists of the parallel digestion of genomic DNA with  
115 two methylation-sensitive isoschizomers (*MspI* and *HpaII*) as frequent cutters, each in combination  
116 with the same rare cutter (*EcoRI*), adaptor ligation, followed by two selective PCR amplifications with  
117 primers complementary to the adaptors but with unique 3' overhangs (Table 2). Thirty-two primer  
118 combinations consisting of eight +3*EcoRI* and four +2*HpaII/MspI* combinations were evaluated with  
119 a subset of 8 randomly selected pre-selective amplifications containing two samples from each group  
120 described in Table 1. The evaluation was done to assess the level of intra-treatment variation for each  
121 primer combination and their ability to generate informative and consistent MSAP profiles. Based on  
122 these results the best two primer combinations (*Hp1/Eco1* and *Hp3/Eco3*) were designated as primers

123 for the selective amplification of 96 samples from the four experimental groups. Resultant PCR  
 124 products labelled with FAM fluorescent dye were diluted 1/10 in sterile nano water and 1 µl was  
 125 combined with 1 µl ROX/HiDi mix (50 µl ROX plus 1 ml HiDi formamide). Samples were then  
 126 denatured by heating at 95 °C for 5 min, snap-cooled on ice for 2 min and run on an ABI PRISM 3100  
 127 Genetic Analyzer Capillary Sequencer (16 capillary array model) at 3 kV for 22 s and 15 kV for 45  
 128 min at 60 °C.

129  
 130 **Table 2. Sequence of oligonucleotides used for MSAP analysis.**

| Oligo name       | Function                       | Sequence                    |
|------------------|--------------------------------|-----------------------------|
| Rv.Ad.HpaII/MspI | HpaII/MspI Reverse Adaptor     | GACGATGAGTCTAGAA            |
| Fw.Ad.HpaII/MspI | HpaII/MspI Forward Adaptor     | CGTTCTAGACTCATC             |
| Rv.Ad. EcoRI     | EcoRI Reverse Adaptor          | AATTGGTACGCAGTCTAC          |
| Fw. Ad. EcoRI    | EcoRI Forward Adaptor          | CTCGTAGACTGCGTACC           |
| Pre. HpaII/MspI  | HpaII/MspI preselective primer | GATGAGTCTAGAACGG <b>T</b>   |
| Pre.EcoRI        | EcoRI preselective primer      | GACTGCGTACCAATTC <b>A</b>   |
| Hp 1*            | HpaII/MspI selective primer    | GATGAGTCTAGAACGG <b>TA</b>  |
| Hp 2             | HpaII/MspI selective primer    | GATGAGTCTAGAACGG <b>TC</b>  |
| Hp 3*            | HpaII/MspI selective primer    | GATGAGTCTAGAACGG <b>TG</b>  |
| Hp 4             | HpaII/MspI selective primer    | GATGAGTCTAGAACGG <b>TT</b>  |
| Eco 1*           | EcoRI selective primer         | GACTGCGTACCAATTC <b>AAA</b> |
| Eco 2            | EcoRI selective primer         | GACTGCGTACCAATTC <b>AAC</b> |
| Eco 3*           | EcoRI selective primer         | GACTGCGTACCAATTC <b>AAG</b> |
| Eco 4            | EcoRI selective primer         | GACTGCGTACCAATTC <b>AAT</b> |
| Eco 5            | EcoRI selective primer         | GACTGCGTACCAATTC <b>ACA</b> |
| Eco6             | EcoRI selective primer         | GACTGCGTACCAATTC <b>ACC</b> |
| Eco 7            | EcoRI selective primer         | GACTGCGTACCAATTC <b>ACG</b> |
| Eco 8            | EcoRI selective primer         | GACTGCGTACCAATTC <b>ACT</b> |

131 All sequences are shown on the 5' to 3' orientation. 3'selective bases are highlighted in bold. \*  
 132 indicates primers chosen for selective amplification.

133  
 134 **Data analysis**

135 GeneMapper® Software Version 4.0 was used to generate a binary data matrix of bands present (1) or  
 136 absent (0) on the MSAP profiles from samples restricted using *EcoRI* and *HpaII* or *MspI* and amplified

137 using the different primer combinations shown in Table 2. Only epiloci ranging from 100 to 500bp in  
138 size were considered for analysis. Fragments present/absent in all but one individual were considered  
139 uninformative and removed from all data sets. GenAlex [31] 6.5 software was used to analyse the  
140 binary data matrix as described in Rodríguez López et al. [30]. In brief, first the frequency of all epiloci  
141 was calculated for each group. Epiloci were considered unique to *in vitro* culture samples (*in vitro*, 1  
142 h LN and/or Post 1 h LN) when their frequency was higher than 75% in the donor plant samples  
143 and lower than 25% in the *in vitro* samples and *vice versa*. Equally, epiloci were considered unique to  
144 cryopreserved samples (1 h LN and/or Post 1 h LN) when their frequency was higher than 75% in the  
145 1h LN samples and lower than 25% in the *in vitro* samples and *vice versa*. Finally, epiloci were  
146 considered associated to *in vitro* culture or cryopreservation when their frequencies were higher than  
147 60% in the donor plant/1h LN samples and lower than 30% in the *in vitro* samples and *vice versa*.  
148 Next using GenAlex (v.6.4), the epigenetic variability between ortets (samples from donor plant) and  
149 ramet groups (samples generated under different *in vitro* conditions, Table 1) was visualized by  
150 Principal Coordinate Analysis (PCoA) based on the amalgamation of the MSAP profiles obtained from  
151 samples restricted with *HpaII* or *MspI* and amplified with primer combinations *Hpl/EcoI* and  
152 *Hp3/Eco3*. Analysis of Molecular Variance (AMOVA) was then used to estimate and test the  
153 significance of the epigenetic diversity within and between the different groups. Pairwise PhiPT  
154 comparisons between each group based on 10000 permutations was used to infer the overall level of  
155 divergence in DNA methylation between groups. Finally, the level of epigenetic variability introduced  
156 by each of the treatments was estimated using two values from the AMOVA: **1** calculated PhiPT  
157 between ortet tree samples and samples from each treatment (*in vitro*, 1h LN, Post 1h LN) (i.e., the  
158 lower the PhiPT, the lower the level of DNA methylation variability associated by that treatment), **2**  
159 The mean sum of squares within population (SSWP) was used to infer epigenetic variation within



160 treatments (the higher the mean SSWP, the higher the level of epigenetic variability associated by that  
 161 treatment) [32].

## 162 Results

### 164 Effect of conservation methods on somatic embryo methylation patterns

165 To analyse the effect of the different *in vitro* conservation methods on the DNA methylation patterns  
 166 of cocoa SE we compared the MSAP profiles of samples from the donor plant (AMAZ 15) to those  
 167 obtained from SE conserved as described in Table 1. A total of 220 fragments ranging from 100bp to  
 168 500bp were generated by primer combinations *HpaI/EcoI* and *Hpa3/Eco3* (108 and 112 fragments  
 169 respectively). Of these, 3.6% (8 epiloci) and 8.6% (19 epiloci) were deemed unique or induced by  
 170 cryopreservation and *in vitro* culture respectively (Table 3). In total 27 *in vitro* cultures and  
 171 cryopreservation markers were obtained, 13 using *HpaII* and 14 using *MspI* (Table 3). Of these  
 172 markers, the frequency of epialleles *HpaII* 1.1 (232), *HpaII* 1.1 (233), *HpaII* 3.3 (168), *MspI* 3.3 (303)  
 173 and *MspI* 3.3 (407) showed a correlation with the accumulation of *in vitro* procedures (i.e. number of  
 174 somatic embryogenesis and cryopreservation events) (Table 3, S1 Fig A-E). In contrast, epialleles  
 175 *HpaII* 1.1 (367), *HpaII* 3.3 (181), *HpaII* 3.3 (142), *MspI* 3.3 (202) and *MspI* 1.1 (278) showed a change  
 176 in frequency associated with somatic embryogenesis/cryopreservation followed by a reversion to  
 177 donor tree allele frequency levels after cryopreservation or after tertiary embryogenesis (Table 3 and  
 178 S1 Fig F-J).

179

180 **Table 3. Somatic embryogenesis/cryopreservation induced epigenetic polymorphisms.**

|                             |              | Primer<br>(epilocus) | Donor | Invitro | 1h LN | Post 1 h<br>LN |
|-----------------------------|--------------|----------------------|-------|---------|-------|----------------|
| Cryopreservation<br>induced | <i>HpaII</i> | 1.1 (232)            | 0%    | 29%     | 80%   | 100%           |
|                             |              | 1.1 (233)            | 100%  | 52%     | 5%    | 0%             |

|                         |              |           |      |     |      |      |
|-------------------------|--------------|-----------|------|-----|------|------|
|                         |              | 1.1 (235) | 89%  | 52% | 20%  | 25%  |
|                         |              | 1.1 (416) | 37%  | 14% | 75%  | 85%  |
|                         |              | 3.3 (168) | 86%  | 29% | 15%  | 0%   |
|                         | <i>MspI</i>  | 1.1 (232) | 0%   | 0%  | 75%  | 79%  |
|                         |              | 3.3 (157) | 91%  | 48% | 25%  | 25%  |
|                         |              | 3.3 (202) | 19%  | 29% | 70%  | 48%  |
| <i>In vitro</i> induced | <i>HpaII</i> | 1.1 (367) | 84%  | 29% | 65%  | 100% |
|                         |              | 1.1 (446) | 11%  | 76% | 65%  | 75%  |
|                         |              | 3.3 (133) | 0%   | 76% | 45%  | 57%  |
|                         |              | 3.3 (142) | 5%   | 76% | 60%  | 48%  |
|                         |              | 3.3 (168) | 86%  | 29% | 15%  | 0%   |
|                         |              | 3.3 (181) | 0%   | 76% | 80%  | 48%  |
|                         |              | 3.3 (187) | 29%  | 95% | 100% | 95%  |
|                         |              | 3.3 (371) | 95%  | 19% | 10%  | 0%   |
|                         | <i>MspI</i>  | 1.1 (278) | 15%  | 71% | 65%  | 0%   |
|                         |              | 1.1 (319) | 90%  | 24% | 25%  | 0%   |
|                         |              | 1.1 (447) | 15%  | 86% | 80%  | 89%  |
|                         |              | 3.3 (188) | 70%  | 10% | 20%  | 5%   |
|                         |              | 3.3 (223) | 78%  | 29% | 70%  | 15%  |
|                         |              | 3.3 (226) | 87%  | 62% | 50%  | 25%  |
|                         |              | 3.3 (288) | 74%  | 24% | 45%  | 5%   |
|                         |              | 3.3 (303) | 4%   | 52% | 55%  | 75%  |
|                         |              | 3.3 (371) | 91%  | 0%  | 5%   | 0%   |
|                         |              | 3.3 (407) | 100% | 71% | 55%  | 30%  |
|                         |              | 3.3 (472) | 70%  | 14% | 45%  | 5%   |

Allele Frequency

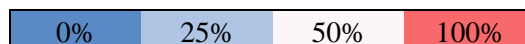

181

182 MSAP generated epiloci unique to *in vitro* culture samples (*in vitro*, 1 h LN and/or Post 1 h LN) and  
 183 to cryopreserved samples (1 h LN and/or Post 1 h LN). MSAP profiles were obtained using  
 184 methylation sensitive isoschizomers *HpaII* and *MspI* and primer combinations and *Hp1/Eco1* and  
 185 *Hp3/Eco3*. Column Primer (epilocus) shows primer combination used to generate the specific MSAP  
 186 product (i.e. 1.1 = *Hp1/Eco1* and 3.3 = *Hp3/Eco3*). Columns Donor, *In vitro*, 1 h LN and Post 1 h LN  
 187 show the frequency of each epiloci in each of the compared groups (i.e. **Donor**: AMAZ 15 cocoa ortet

188 tree used to regenerate all somatic embryos; **Invitro**: *In vitro* maintained secondary somatic embryos;  
189 **1 h LN**: Secondary somatic embryos recovered from after 1 hour storage in liquid nitrogen and **Post**  
190 **1 h LN**: tertiary somatic embryos generated from 1 h LN samples).

191

192 AMOVA of profiles generated using *HpaII* showed that 19% of the variation was explained by  
193 differences between groups while 81% was due to individual differences. Similarly, 21% of the  
194 variability detected by *MspI* was explained by differences between groups and 79% was due to  
195 individual differences. Principal Coordinate Euclidean Analysis (PCoA) was used to provide an  
196 overview of the epigenetic variability introduced by somatic embryogenesis and cryopreservation.  
197 Overall, profiles generated using both *MspI* and *HpaII* provided a clear separation between donor plant  
198 samples and all SE samples (Fig 2A). However, the separation observed between the different ramet  
199 groups was slightly clearer when using profiles from samples restricted with *MspI* (Fig 2B) than with  
200 *HpaII* (Figure2C). PhiPT values confirmed the epigenetic variation observed between groups using  
201 PCoA analysis, with groups presenting higher levels of epigenetic divergence when *MspI* profiles were  
202 used (Table 4). The largest differences between groups were detected between donor plant samples  
203 and cryopreserved samples (i.e. 1h LN and Post-1h LN) whilst the lowest levels of epigenetic  
204 divergence between groups were detected between both cryopreserved samples (i.e. 1h LN and Post-  
205 1h LN) restricted using *HpaII*. AMOVA analysis using 10000 permutations showed that all pairwise  
206 distances were significant ( $P > 0.0002$ ). When PhiPT values generated from *HpaII* and *MspI* MSAP  
207 profiles were taken together, Post-1h LN samples were the most epigenetically divergent from the  
208 donor samples (Fig 3A). Analysis of epigenetic variance within groups estimated using the mean  
209 SSWP showed similar levels of variability amongst donor, *in vitro* and Post-1h LN. However, higher  
210 levels of variability were detected between 1h LN samples (mean  $SSWP_{MspI} = 278$ ) compared to both

211 donor plant samples (mean  $SSWP_{MspI} = 237$ ) and to non-cryopreserved somatic embryos (mean  
 212  $SSWP_{MspI} = 229$ ) (Fig 3B).

213

214 **Table 4. Somatic embryogenesis and cryopreservation induced epigenetic differences.**

|              |                   | <b>Donor</b> | <b>Invitro</b> | <b>1 h LN</b> | <b>Post 1h LN</b> |
|--------------|-------------------|--------------|----------------|---------------|-------------------|
| <i>HpaII</i> | <b>Donor</b>      | -            | 0.0001         | 0.0001        | 0.0001            |
|              | <b>Invitro</b>    | 0.2232       | -              | 0.0001        | 0.0002            |
|              | <b>1 h LN</b>     | 0.2798       | 0.1401         | -             | 0.0001            |
|              | <b>Post 1h LN</b> | 0.2707       | 0.0658         | 0.0778        | -                 |
| <i>MspI</i>  | <b>Donor</b>      | -            | 0.0001         | 0.0001        | 0.0001            |
|              | <b>Invitro</b>    | 0.2559       | -              | 0.0001        | 0.0001            |
|              | <b>1 h LN</b>     | 0.2340       | 0.0896         | -             | 0.0001            |
|              | <b>Post 1h LN</b> | 0.3764       | 0.1206         | 0.1536        | -                 |

215 Epigenetic distances (PhiPT) between groups (i.e. **Donor:** AMAZ 15 cocoa ortet tree used to  
 216 regenerate all somatic embryos; **Invitro:** *In vitro* maintained secondary somatic embryos; **1 h LN:**  
 217 Secondary somatic embryos recovered from after 1 h storage in liquid nitrogen and **Post 1 h LN:**  
 218 tertiary somatic embryos generated from 1 h LN samples) were calculated using Analysis of Molecular  
 219 Variance (AMOVA) inferred from the analysis of methylation-sensitive amplified polymorphism  
 220 (MSAP) assays using methylation sensitive isoschizomers *HpaII* and *MspI* and primer combinations  
 221 *Hp1/Eco1* and *Hp3/Eco3*. PhiPT Values are shown below diagonal (-). Probability of having a more  
 222 extreme PhiPT than the observed values by chance alone based on 10,000 permutations is shown above  
 223 diagonal.

224

## 225 Discussion

226

## 227 **Somaclonal variation among conserved somatic embryos**

228 Conventional propagation of elite cocoa clones via cuttings has been hampered by costs and undesired  
229 phenotypes associated with this type of propagule. Moreover, the long term conservation of cocoa is  
230 hindered by high levels of variability in agronomic performance and the poor low temperature storage  
231 ability of cocoa seeds [33]. For these reasons considerable effort has been put into the development of  
232 *in vitro* propagation and cryopreservation systems (for an extensive review see [34]). However, the  
233 passage of cells through *in vitro* culture [11] and cryopreservation [35] may lead to undesirable  
234 changes (somaclonal variation) in the regenerants. Although the effect of *in vitro* culture, somatic  
235 embryogenesis and cryopreservation of somatic embryos on the morphological and genetic fidelity of  
236 cocoa plants has been extensively studied [12,14–16,36], very little is known about the epigenetic  
237 modifications introduced by the cryopreservation of cocoa somatic embryos.

238 Not surprisingly, our results showed an increase in variability in all *in vitro* cultured samples (*in vitro*,  
239 1h LN, Post 1h LN). As we have shown previously, this variability is both genetic and epigenetic in  
240 nature [12,14–16,36]. More interestingly, SSE recultured after one hour in liquid nitrogen (i.e. 1h LN  
241 and Post-1h LN) showed an increase in genetic/epigenetic distance from the donor samples , and higher  
242 levels of within group genetic/epigenetic variability than donor plant samples and thannon-  
243 cryopreserved somatic embryos. High frequencies of morphological abnormalities in cryostored and  
244 non-cryostored cocoa somatic embryos have been reported [37–39] suggesting that both somatic  
245 embryogenesis and cryopreservation can induce somaclonal variability. Evidence from other plant  
246 species such as papaya [35] and chrysanthemum [40] suggests that such variation is both genetic and  
247 epigenetic (i.e. DNA methylation) in nature. However, our previous work has shown that the genetic  
248 variability attributable to the encapsulation-dehydration and vitrification cryopreservation of cocoa SE  
249 methodologies used here [29,41] is negligible [16,36]. We, therefore, speculate that this observed  
250 increased within group variability is mainly epigenetic in nature, as previously shown in somatic

251 embryo-derived oil palm [42] and cryopreserved hop plants [13]. Moreover, this higher level of within  
252 group variability observed in cryopreserved samples (1 h LN) supports the hypothesis that a large  
253 fraction of stress (cold, dehydration, etc.) induced epigenetic variation occurs randomly across the  
254 genome [43,44].

255 Interestingly, TSE regenerated from cryopreserved SSE (Post 1h LN) showed intermediate within  
256 group genetic/epigenetic variability (mean  $SSWP_{MspI} = 264$ ). This would indicate that the  
257 cryopreservation induced variability observed in 1h LN samples is partially reversible, supporting the  
258 hypothesis of it being epigenetic. Conversely, tertiary somatic embryos in the Post 1h LN group  
259 showed a significantly higher PhiPT distance from donor samples than that observed for SSE (*in vitro*  
260 and 1h LN samples), suggesting that this extra somatic embryogenesis event does introduce additional  
261 genomic variability. Analysis of scanning electron microscopy images have shown that TSE after  
262 cryopreservation generally regenerate directly from SSE epidermal cells [16] without the intermediate  
263 callus phase which is normally associated with higher levels of somaclonal variation. Nonetheless,  
264 epigenetic somaclonal variation is not limited to the passage through a dedifferentiated phase as shown  
265 in micropropagated cassava [26]. Furthermore, this increase in variation following another step of  
266 somatic embryogenesis is in line with a number of studies on *in vitro* culture variation which report  
267 that variation increases with the number of multiplication cycles [3,13]. However, we have also shown  
268 that successive rounds of somatic embryogenesis in cocoa reduce the detected levels of genetic  
269 variability [16]. It is therefore tempting to speculate that this increase in PhiPT observed using MSAPs  
270 is also mainly epigenetic in nature. A factor possibly responsible for this elevated epigenetic variability  
271 might be the presence of growth regulators (2,4-D and 6-BA at 1 mg/l and 50  $\mu$ l /l respectively) used  
272 during the induction of TSE, which have been reported to contribute to epi-mutations in tissue culture  
273 derived materials [45].

274

275 Finally, it is widely accepted that in general the majority of the developmental epigenetic variability  
276 occurs randomly across the genome [43,44]. It would therefore be expected that the accumulation of  
277 stochastic variation during successive somatic embryogenesis events would increase the observed  
278 differences between samples of the same group. If this was the case, then non cryopreserved SSEs  
279 should present higher levels of within group variability than donor samples but lower than TSE.  
280 However, we observed similar levels of within group variability, measured here as mean SSWP,  
281 among all compared groups (donor, *in vitro*, and post 1h LN) suggesting that the somatic  
282 embryogenesis-induced variability detected here is not stochastic but probably resulted from a directed  
283 adaptation to the successive growing environments to which SEs are exposed.

284

## 285 **Conclusions**

286 The results shown here support previous evidence [16] that the high levels of phenotypic variability  
287 observed in cryostored cocoa SE may be symptomatic of epigenetic change. More importantly, our  
288 results suggest that this observed variability is not necessarily stochastic in nature, but might be  
289 partially a response to the environmental stresses that plant cells are exposed to during *in vitro* culture  
290 and cryopreservation. One would expect that the main contributor to this observed variability would  
291 be low temperature. In fact RNA directed DNA methylation is upregulated by low temperature [46].  
292 However previous work has shown that low temperature alone does not explain all the variability  
293 observed during cryopreservation. For example, the use of the cryoprotectant DMSO, which chelates  
294 to nucleic acids, as a cryoprotectant might not only be introducing genetic changes, as shown  
295 previously [47] but may be potentially causing numerous DNA methylation changes. What is more,  
296 Harding et al. [48] reported that changes on methylation of DNA sequences may be an adaptive  
297 response to conditions of high osmotic stress induced by the used of high concentration of sucrose  
298 during vitrification. Understanding how these factors affect the fidelity of the regenerant plants will

299 ultimately help in the development of new cryopreservation methodologies with lower levels of  
300 phenotypic, genetic and epigenetic variation.

301

## 302 **References**

- 303 1. Phillips RL, Kaeppler SM, Olhoft P. Genetic instability of plant tissue cultures: breakdown of  
304 normal controls. *Proc Natl Acad Sci USA*. 1994;91: 5222–5226.
- 305 2. Burg K, Helmersson A, Bozhkov P, von Arnold S. Developmental and genetic variation in  
306 nuclear microsatellite stability during somatic embryogenesis in pine. *J Exp Bot*. 2007;58:  
307 687–698. doi:10.1093/jxb/erl241.
- 308 3. Côte FX, Teisson C, Perrier X. Somaclonal variation rate evolution in plant tissue culture:  
309 Contribution to understanding through a statistical approach. *In Vitro CellDevBiol-Plant*. 2001;  
310 37: 539–542. doi:10.1007/s11627-001-0093-z.
- 311 4. Joyce SM, Cassells AC. Variation in potato microplant morphology in vitro and DNA  
312 methylation. *Plant Cell, Tissue and Organ Culture*. 2002;70: 125–137.
- 313 5. Rodríguez López CM, Wilkinson MJ. Epi-fingerprinting and epi-interventions for improved  
314 crop production and food quality. *Front Plant Sci*. 2015;6: 397. doi:10.3389/fpls.2015.00397.
- 315 6. Davey C, Pennings S, Allan J. CpG methylation remodels chromatin structure in vitro. *J Mol*  
316 *Biol*. 1997;267: 276–288. doi:10.1006/jmbi.1997.0899.
- 317 7. Inamdar NM, Ehrlich KC, Ehrlich M. CpG methylation inhibits binding of several sequence-  
318 specific DNA-binding proteins from pea, wheat, soybean and cauliflower. *Plant Mol Biol*.  
319 1991;17: 111–123.
- 320 8. Kass SU, Pruss D, Wolffe AP. How does DNA methylation repress transcription? *Trends*  
321 *Genet*. 1997;13: 444–449. doi:10.1016/S0168-9525(97)01268-7.
- 322 9. Schmitt F, Oakeley EJ, Jost JP. Antibiotics induce genome-wide hypermethylation in cultured  
323 *Nicotiana tabacum* plants. *J Biol Chem*. 1997;272: 1534–1540.
- 324 10. Bardini M, Labra M, Winfield M, Sala F. Antibiotic-induced DNA methylation changes in  
325 calluses of *Arabidopsis thaliana*. *Plant Cell, Tissue and Organ Culture*. 2003;72: 157–162.
- 326 11. Miguel C, Marum L. (2011) An epigenetic view of plant cells cultured in vitro: somaclonal  
327 variation and beyond. *J Exp Bot* 62: 3713–3725. doi:10.1093/jxb/err155.



- 328 12. Rodríguez López CM, Wetten AC, Wilkinson MJ. Progressive erosion of genetic and  
329 epigenetic variation in callus-derived cocoa (*Theobroma cacao*) plants. *New Phytol* 2010;186:  
330 856–868. doi:10.1111/j.1469-8137.2010.03242.x.
- 331 13. Peredo EL, Arroyo-García R, Revilla MA. Epigenetic changes detected in micropropagated  
332 hop plants. *J Plant Physiol.* 2009;166: 1101–1111. doi:10.1016/j.jplph.2008.12.015.
- 333 14. Rodríguez López CM, Wetten AC, Wilkinson MJ. Detection and quantification of in vitro-  
334 culture induced chimerism using simple sequence repeat (SSR) analysis in *Theobroma cacao*  
335 (*L.*). *Theor Appl Genet* 2004;110: 157–166. doi:10.1007/s00122-004-1823-5.
- 336 15. Rodríguez López C, Bravo H, Wetten A, Wilkinson M. Detection of somaclonal variation  
337 during cocoa somatic embryogenesis characterised using cleaved amplified polymorphic  
338 sequence and the new freeware Artbio. *Molecular Breeding.* 2010;25: 501–516.  
339 doi:10.1007/s11032-009-9348-x.
- 340 16. Fang J-Y, Wetten A, Adu-Gyamfi R, Rodriguez-Lopez C. Use of secondary somatic embryos  
341 promotes genetic fidelity in cryopreservation of cocoa (*Theobroma cacao L.*). *Agricultural and*  
342 *Food Science.* 2009;18: 152-159.
- 343 17. Wilkinson T, Wetten A, Prychid C, Fay MF. Suitability of cryopreservation for the long-term  
344 storage of rare and endangered plant species: a case history for *Cosmos atrosanguineus*. *Ann*  
345 *Bot.* 2003;91: 65–74.
- 346 18. Reyna-López GE, Simpson J, Ruiz-Herrera J. Differences in DNA methylation patterns are  
347 detectable during the dimorphic transition of fungi by amplification of restriction  
348 polymorphisms. *Mol Gen Genet.* 1997;253: 703–710.
- 349 19. Alonso C, Pérez R, Bazaga P, Medrano M, Herrera CM. MSAP markers and global cytosine  
350 methylation in plants: a literature survey and comparative analysis for a wild-growing species.  
351 *Mol Ecol Resour.* 2016;16: 80–90. doi:10.1111/1755-0998.12426.
- 352 20. Xiong LZ, Xu CG, Saghai Maroof MA, Zhang Q. Patterns of cytosine methylation in an elite  
353 rice hybrid and its parental lines, detected by a methylation-sensitive amplification  
354 polymorphism technique. *Mol Gen Genet.* 1999;261: 439–446.
- 355 21. Matthes M, Singh R, Cheah S-C, Karp A. Variation in oil palm (*Elaeis guineensis* Jacq.) tissue  
356 culture-derived regenerants revealed by AFLPs with methylation-sensitive enzymes. *TAG*  
357 *Theoretical and Applied Genetics.* 2001;102: 971–979. doi:10.1007/s001220000491.
- 358 22. Bednarek PT, Orłowska R, Koebner RM, Zimny J. Quantification of the tissue-culture induced  
359 variation in barley (*Hordeum vulgare L.*). *BMC Plant Biol.* 2007;7: 10. doi:10.1186/1471-  
360 2229-7-10.

- 361 23. Smýkal P, Valledor L, Rodríguez R, Griga M. Assessment of genetic and epigenetic stability in  
362 long-term in vitro shoot culture of pea (*Pisum sativum* L.). *Plant Cell Rep.* 2007;26: 1985–  
363 1998. doi:10.1007/s00299-007-0413-9.
- 364 24. Dann AL, Wilson CR Comparative assessment of genetic and epigenetic variation among  
365 regenerants of potato (*Solanum tuberosum*) derived from long-term nodal tissue-culture and  
366 cell selection. *Plant Cell Rep.* 2011;30: 631–639. doi:10.1007/s00299-010-0983-9.
- 367 25. Baránek M, Čechová J, Raddová J, Holleinová V, Ondrušíková E, Pidra M. Dynamics and  
368 Reversibility of the DNA Methylation Landscape of Grapevine Plants (*Vitis vinifera*) Stressed  
369 by In Vitro Cultivation and Thermotherapy. *PLoS ONE.* 2015;10: e0126638.  
370 doi:10.1371/journal.pone.0126638.
- 371 26. Kitimu SR, Taylor J, March TJ, Tairo F, Wilkinson MJ, Rodríguez López C. Meristem  
372 micropropagation of cassava (*Manihot esculenta*) evokes genome-wide changes in DNA  
373 methylation. *Frontiers in Plant Science.* 2015;6: 590. doi: 10.3389/fpls.2015.00590
- 374 27. Gimenez MD, Yañez-Santos AM, Paz RC, Quiroga MP, Marfil CF, Conci VC. Assessment of  
375 genetic and epigenetic changes in virus-free garlic (*Allium sativum* L.) plants obtained by  
376 meristem culture followed by in vitro propagation. *Plant Cell Rep.* 2016;35: 129-141.  
377 doi:10.1007/s00299-015-1874-x.
- 378 28. Maximova SN, Alemanno L, Young A, Ferriere N, Traore A, Gultinan MJ. Efficiency,  
379 genotypic variability, and cellular origin of primary and secondary somatic embryogenesis of  
380 *Theobroma cacao* L. *In Vitro Cell Dev Biol-Plant.* 2002;38: 252–259.  
381 doi:10.1079/IVP2001257.
- 382 29. Adu-Gyamfi R, Wetten A. Cryopreservation of cocoa (*Theobroma cacao* L.) somatic embryos  
383 by vitrification. *Cryo Letters.* 2012;33: 494–505.
- 384 30. Rodríguez López C, Morán P, Lago F, Espiñeira M, Beckmann M, Consuegra S. Detection and  
385 quantification of tissue of origin in salmon and veal products using methylation sensitive  
386 AFLPs. *Food Chem.* 2012;131: 1493–1498. doi:10.1016/j.foodchem.2011.09.120.
- 387 31. Peakall R, Smouse PE. GenAlEx 6.5: genetic analysis in Excel. Population genetic software for  
388 teaching and research--an update. *Bioinformatics.* 2012;28: 2537–2539.  
389 doi:10.1093/bioinformatics/bts460.
- 390 32. Amoah S, Kurup S, Rodriguez Lopez CM, Welham SJ, Powers SJ, Hopkins CJ, et al. A  
391 hypomethylated population of *Brassica rapa* for forward and reverse epi-genetics. *BMC Plant*  
392 *Biol.* 2012;12: 193. doi:10.1186/1471-2229-12-193.
- 393 33. Li Z, Traore A, Maximova S, Gultinan MJ. Somatic embryogenesis and plant regeneration  
394 from floral explants of cacao (*Theobroma cacao* L.) using thidiazuron. *In Vitro Cell Dev Biol-*  
395 *Plant.* 1998;34: 293–299. doi:10.1007/BF02822737.

- 396 34. Gultinan MJ. Cacao. In: Pua E, Davey MR, editors. *Transgenic Crops V*. Berlin, Heidelberg:  
397 Springer Berlin Heidelberg; 2007. pp. 497–518. doi:10.1007/978-3-540-49161-3\_21.
- 398 35. Kaity A, Ashmore SE, Drew RA, Dulloo ME. Assessment of genetic and epigenetic changes  
399 following cryopreservation in papaya. *Plant Cell Rep*. 2008;27: 1529–1539.  
400 doi:10.1007/s00299-008-0558-1.
- 401 36. Wetten A, Adu-Gyamfi R, Fang J-Y, Rodriguez-Lopez C. Cryopreservation of cocoa  
402 (*Theobroma cacao* L.) somatic embryos - is somaclonal variation an issue? *Cryoletters*.  
403 2009;30: 84–85.
- 404 37. Alemanno L, Berthouly M, Michaux-Ferrière N. Histology of somatic embryogenesis from  
405 floral tissues cocoa. *Plant Cell, Tissue and Organ Culture*. 1996;46: 187–194.  
406 doi:10.1007/BF02307094.
- 407 38. Alemanno L, Berthouly M, Michaux-Ferriere N. A comparison between *Theobroma cacao* L.  
408 zygotic embryogenesis and somatic embryogenesis from floral explants. *In Vitro Cell Dev*  
409 *Biol-Plant*. 1997;33: 163–172. doi:10.1007/s11627-997-0016-8.
- 410 39. Tan CL, Furtek DB. Development of an in vitro regeneration system for *Theobroma cacao*  
411 from mature tissues. *Plant Sci*. 2003;164: 407–412. doi:10.1016/S0168-9452(02)00428-4.
- 412 40. Martín C, Cervera MT, González-Benito ME. Genetic stability analysis of chrysanthemum  
413 (*Chrysanthemum x morifolium* Ramat) after different stages of an encapsulation-dehydration  
414 cryopreservation protocol. *J Plant Physiol*. 2011;168: 158–166.  
415 doi:10.1016/j.jplph.2010.06.025.
- 416 41. Fang J, Wetten A, Hadley P. Cryopreservation of cocoa (*Theobroma cacao* L.) somatic  
417 embryos for long-term germplasm storage. *Plant Sci*. 2004;166: 669–675.  
418 doi:10.1016/j.plantsci.2003.11.002.
- 419 42. Jaligot E, Rival A, Beule T, Dussert S, Verdeil J-L. Somaclonal variation in oil palm (*Elaeis*  
420 *guineensis* Jacq.): the DNA methylation hypothesis. *Plant Cell Reports*. 2000;19: 684–690.  
421 doi:10.1007/s002999900177.
- 422 43. Vogt G. Stochastic developmental variation, an epigenetic source of phenotypic diversity with  
423 far-reaching biological consequences. *J Biosci*. 2015;40: 159–204. doi:10.1007/s12038-015-  
424 9506-8.
- 425 44. Soen Y, Knafo M, Elgart M. A principle of organization which facilitates broad Lamarckian-  
426 like adaptations by improvisation. *Biol Direct*. 2015;10: 68. doi:10.1186/s13062-015-0097-y.
- 427 45. Chakrabarty D, Yu KW, Paek KY. Detection of DNA methylation changes during somatic  
428 embryogenesis of Siberian ginseng (*Eleutherococcus senticosus*). *Plant Sci*. 2003;165: 61–68.  
429 doi:10.1016/S0168-9452(03)00127-4.

- 430 46. Tuttle JR, Idris AM, Brown JK, Haigler CH, Robertson D. Geminivirus-mediated gene  
431 silencing from Cotton leaf crumple virus is enhanced by low temperature in cotton. *Plant*  
432 *Physiol.* 2008;148: 41–50. doi:10.1104/pp.108.123869.
- 433 47. Aronen TS, Krajnakova J, Häggman HM, Ryyänen LA. Genetic fidelity of cryopreserved  
434 embryogenic cultures of open-pollinated *Abies cephalonica*. *Plant Sci.* 1999;142: 163–172.  
435 doi:10.1016/S0168-9452(98)00244-1.
- 436 48. Harding K. The methylation status of DNA derived from potato plants recovered from slow  
437 growth. *Plant Cell, Tissue and Organ Culture.* 1994;37: 31–38. doi:10.1007/BF00048114.
- 438

439 **Fig 1. Schematic representation of experimental design.** Somatic embryogenesis was initiated from  
 440 staminodes (red squares) obtained from a single AMAZ 15 cocoa tree from the International Cocoa  
 441 Quarantine Centre, Reading, UK. Triangles represent 24 samples collected from individual newly  
 442 expanded leaves for DNA extraction from each group (Donor plant (Red) and somatic embryo derived  
 443 plants (Green)). Orange boxes represent successive somatic embryogenic events (as described in [28]).  
 444 Blue boxes represent a cryopreservation event (1 h in liquid nitrogen) of somatic embryos (as described  
 445 [29]). Green boxes represent maintenance of somatic embryos *in vitro* on ED medium [28]. Horizontal  
 446 bar represents accumulated time spend under *in vitro* conditions by the samples used in this study.

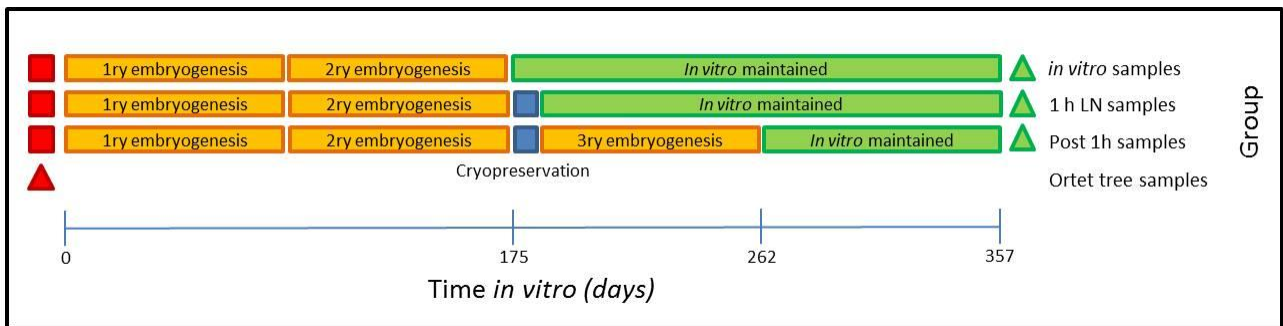

458 **Fig 2. Effect of conservation method on somaclonal variation pattern in cocoa somatic embryos.**  
459 Principal coordinate analysis based on Euclidean Analysis of MSAP distances between 72 somatic  
460 embryos grouped by method of conservation and 24 leaf samples of the donor tree. MSAP profiles  
461 were obtained using methylation sensitive isoschizimers *MspI* (circles) and *HpaII* (rhomboids) and  
462 methylation insensitive enzyme *EcoRI* primer combinations and *Hp1/Eco1* and *Hp3/Eco3*. Individual  
463 figures show PCoA analysis from MSAP profiles obtained using (A) both *MspI* and *HpaII*, (B) *MspI*  
464 only and (C) *HpaII* only. 1 h: SEs recovered from secondary SE after 1 hour storage in liquid nitrogen;  
465 Post 1 h: tertiary SEs generated from 1 h samples; Invitro: *In vitro* maintained secondary SEs, and  
466 Donor: AMAZ 15 cocoa ortet tree used to regenerate SEs. Hp or Msp preceding a treatment means  
467 MSAP profiles were generated using restriction enzyme *HpaII* and *MspI* respectively.  
468

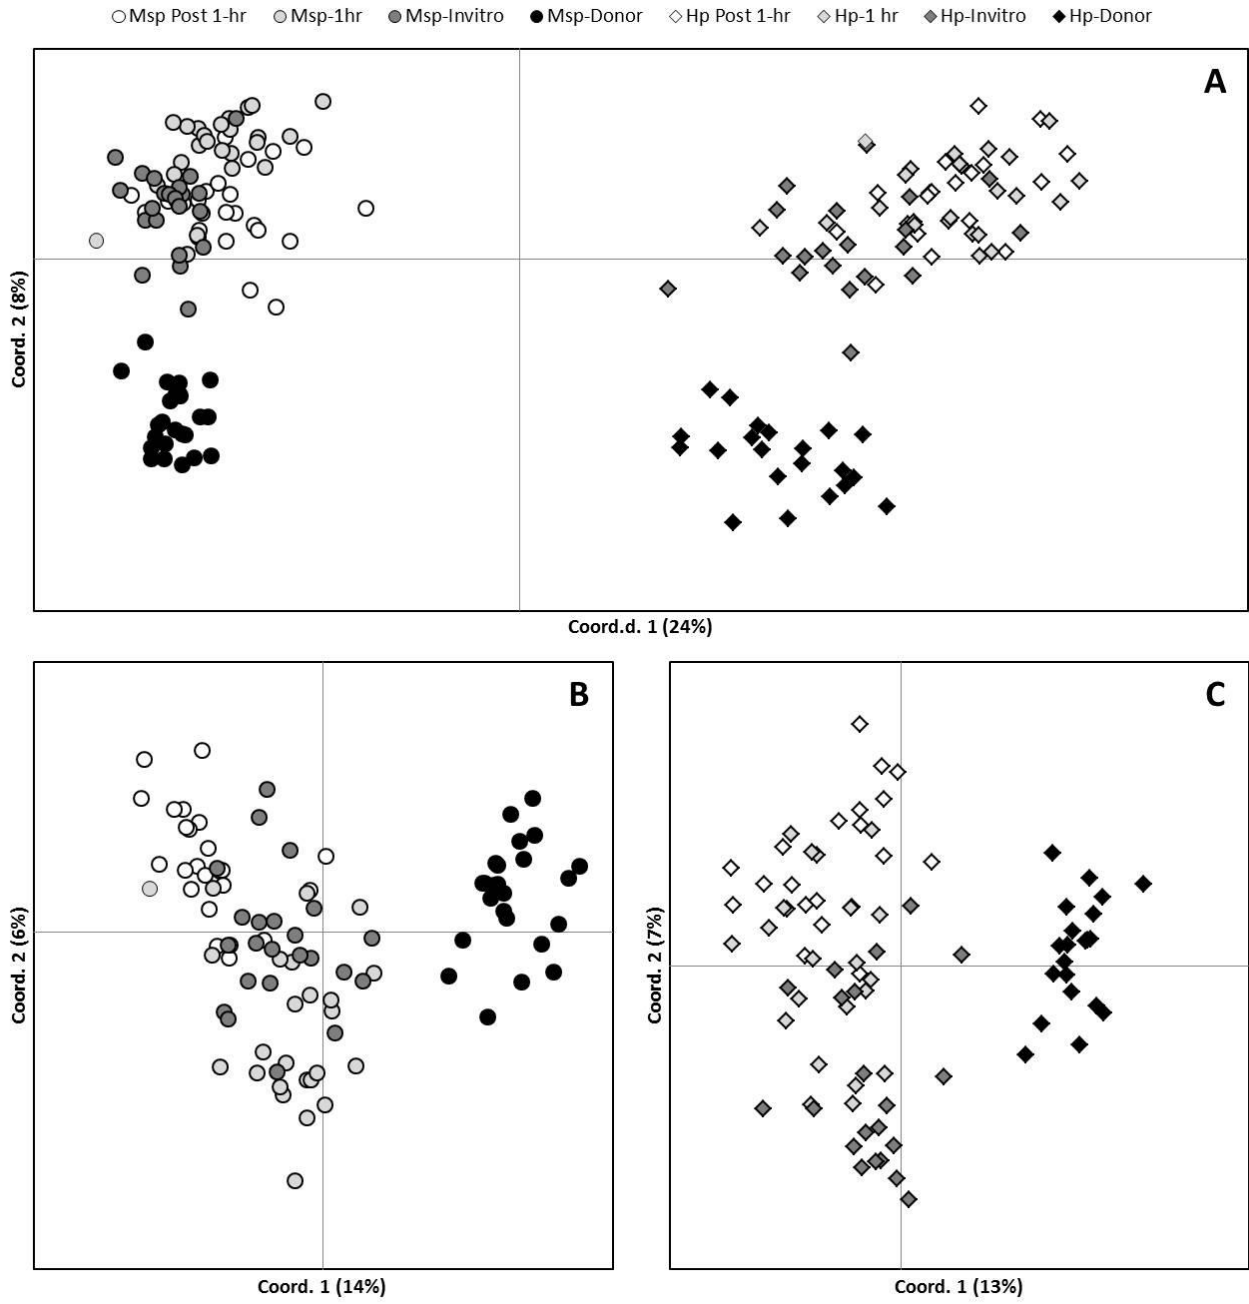

469

470

471

472

473

474 **Fig 3. Somatic embryogenesis and cryopreservation induced between epigenetic variability. (A)**  
475 Bars represent epigenetic distance (PhiPT) between ortet tree samples and each of the *in vitro*  
476 treatments (**Invitro**: *In vitro* maintained secondary somatic embryos; **1 h LN**: Secondary somatic  
477 embryos recovered from after 1 hour storage in liquid nitrogen and **Post 1 h LN**: tertiary somatic  
478 embryos generated from 1 h LN samples) calculated using 10.000 permutations and AMOVA analysis.  
479 **(B)** Bars represent the average epigenetic variability (mean sum of squares within population (SSWP))  
480 between samples with the same origin (i.e. Donor, Invitro, 1 h LN and Post 1 h LN). PhiPT and SSWP  
481 values were calculated using GenAlex 6.1 software from MSAP profiles generated combining  
482 *Hp3/Eco3* and *Hp1/Eco1* selective primer combinations and restriction enzymes *HapII* (Blue) and  
483 *MspI* (red) as frequent cutters. All somatic embryos and ortet tree samples (24 per treatment) were  
484 initiated/collected from a single AMAZ 15 cocoa tree from the International Cocoa Quarantine Centre,  
485 Reading, UK. \* Indicates significantly different ( $P > 0.0002$ ) PhiPT values between treatments.



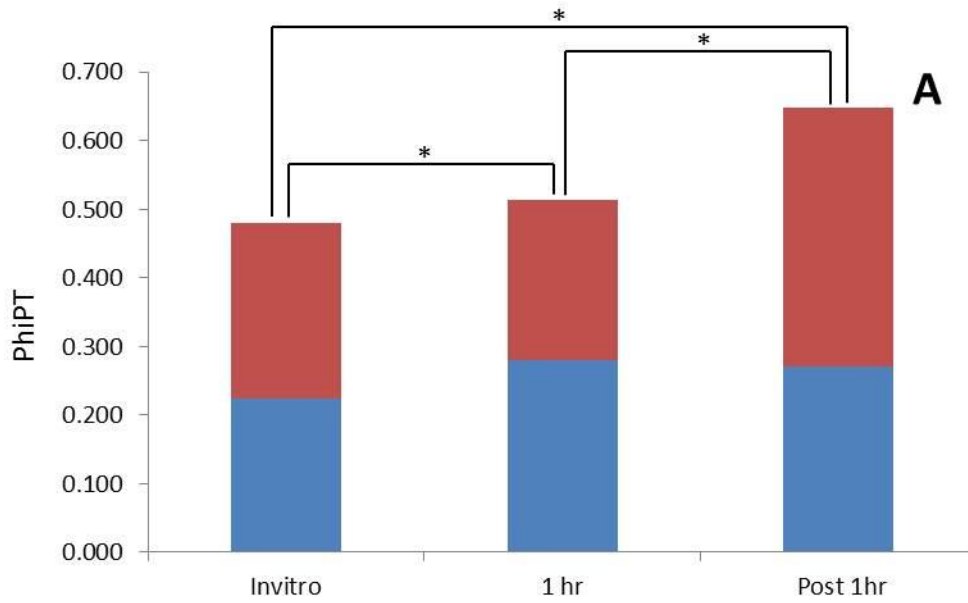

486

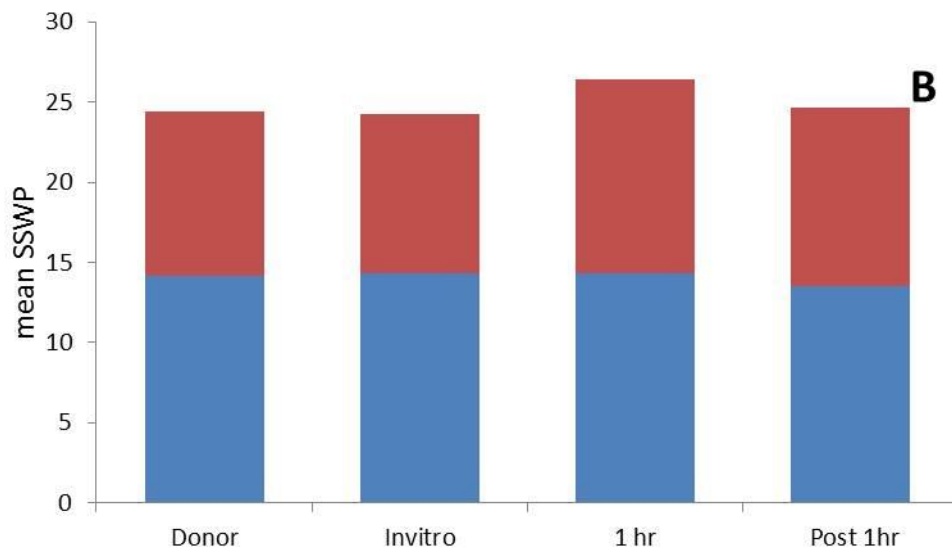

487

488

489

490

491

492

493

## 494 **Supporting Information**

495 **S1 Fig. Effect of somatic embryogenesis and cryopreservation on epilocus frequency.** Values on  
496 the horizontal axis indicated the number of treatments each group has been subjected to (0= Donor  
497 Plant, 1= secondary somatic embryos maintained in ED medium, 2= secondary somatic embryos after  
498 cryopreservation for 1 h in liquid nitrogen (1h LN) and 3= tertiary somatic embryos generated from 1  
499 h LN samples). Epilocus frequencies were calculated from presence/absence MSAP profiles generated  
500 combining *Hp3/Eco3* and *Hp1/Eco1* selective primer combinations and restriction enzymes *HapII* and  
501 *MspI* using GenAlex 6.1 software.

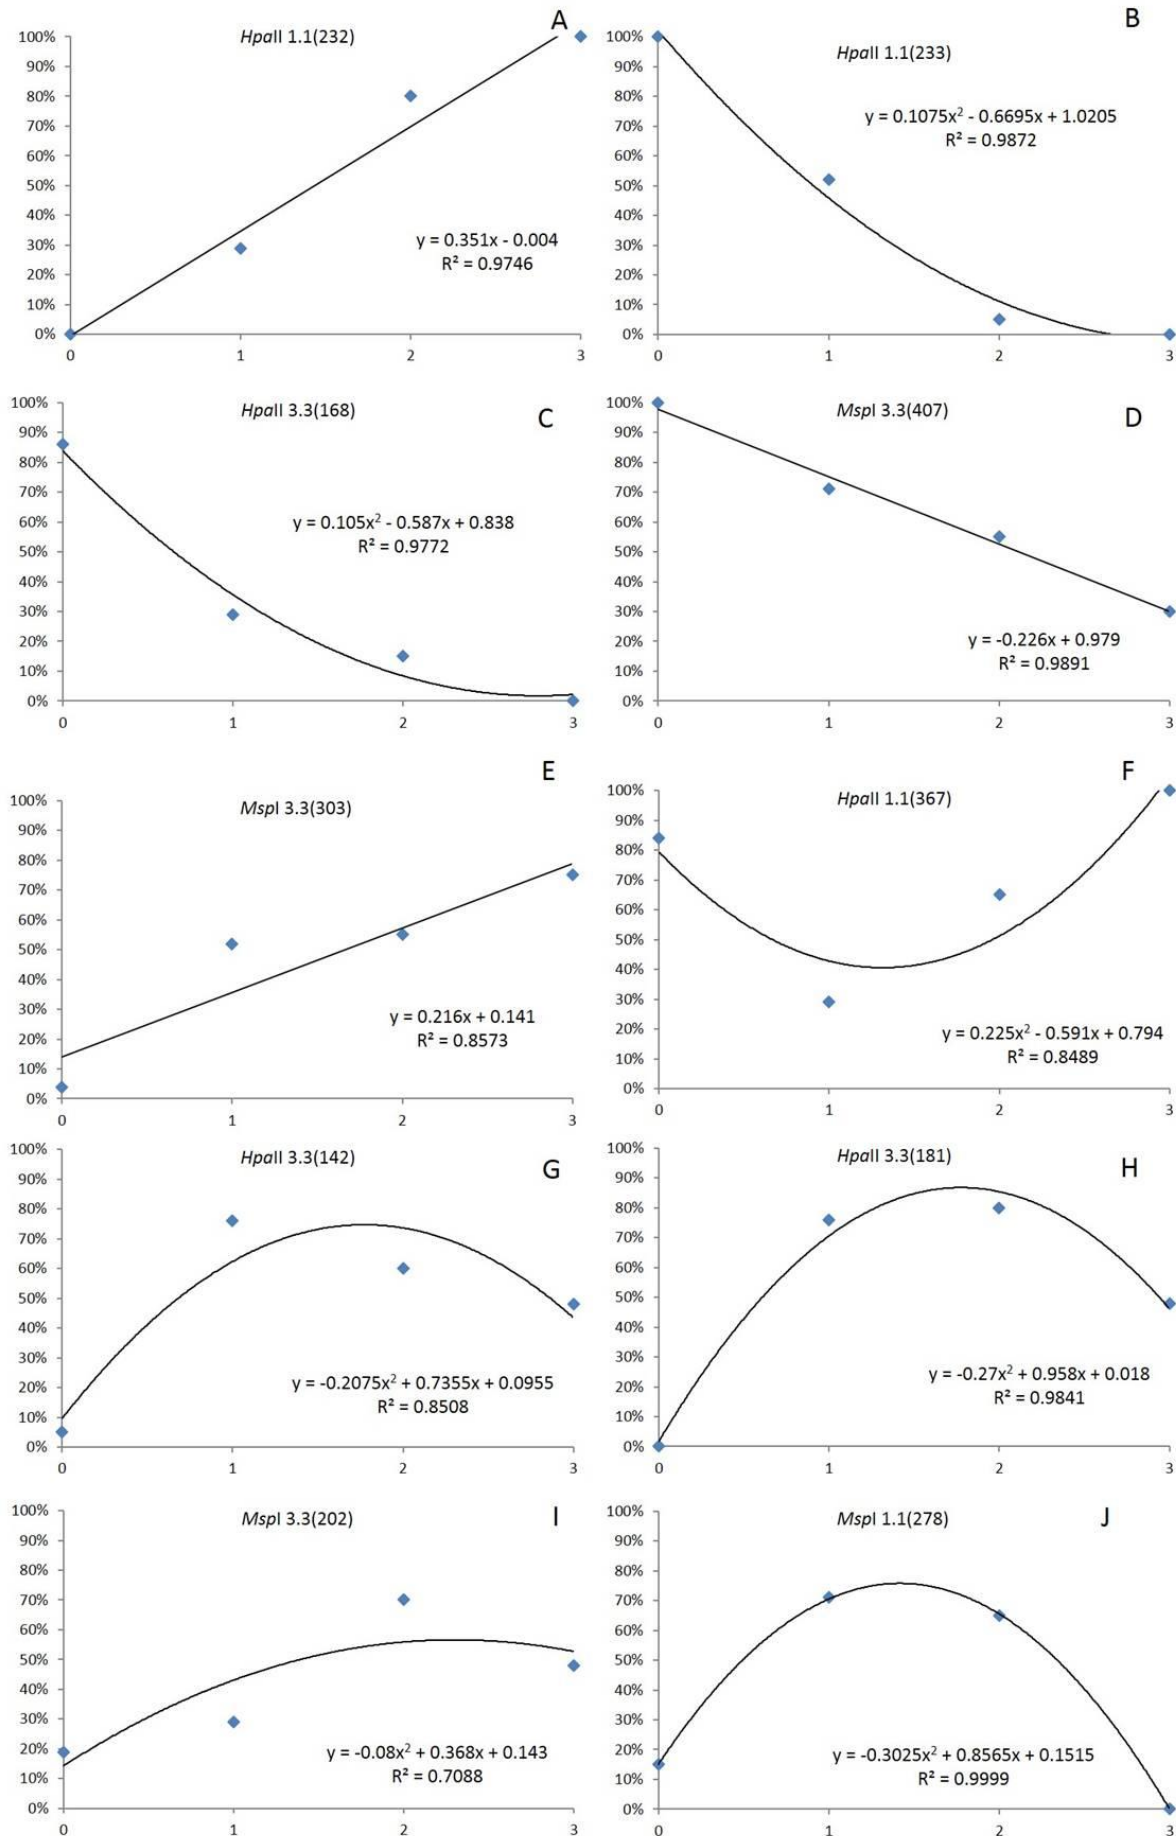

Source: http://biorxiv.org/content/10.1101/057273v2.full.pdf
